# Supplementary material for: FIH permits NAA10 to catalyze the oxygen-dependent lysyl-acetylation of HIF-1α
Source: PubMed Central journal article supplement (PMC6142190; doi:10.1016/j.redox.2018.09.002), 2018-09-07
Supplement: mmc1.pdf [file mmc1.pdf]

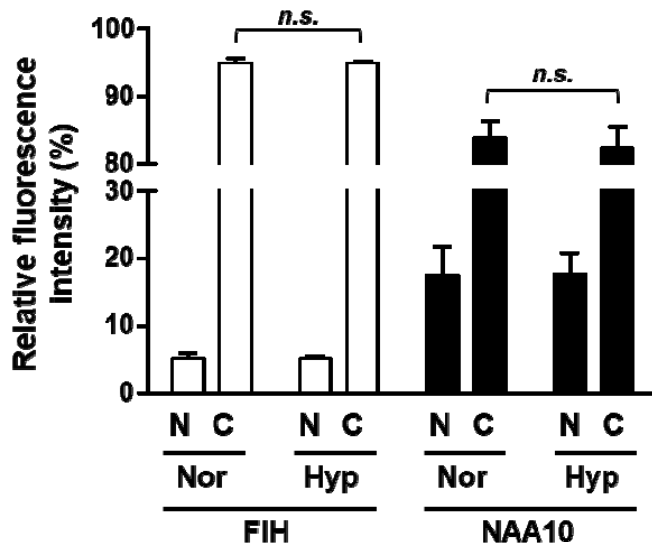

**Figure S1. Subcellular localization of FIH and NAA10 is not changed by hypoxia.** Confocal images in Fig. 1E are analyzed with Image J plugin. Immunofluorescence intensities of nucleus and total cells were quantitated in three cells per image. Intensities of cytoplasm were calculated by subtraction of nucleus intensity from total cell intensity. (N; nucleus, C; cytoplasm, Nor; 21% oxygen, Hyp; 0.5% oxygen)

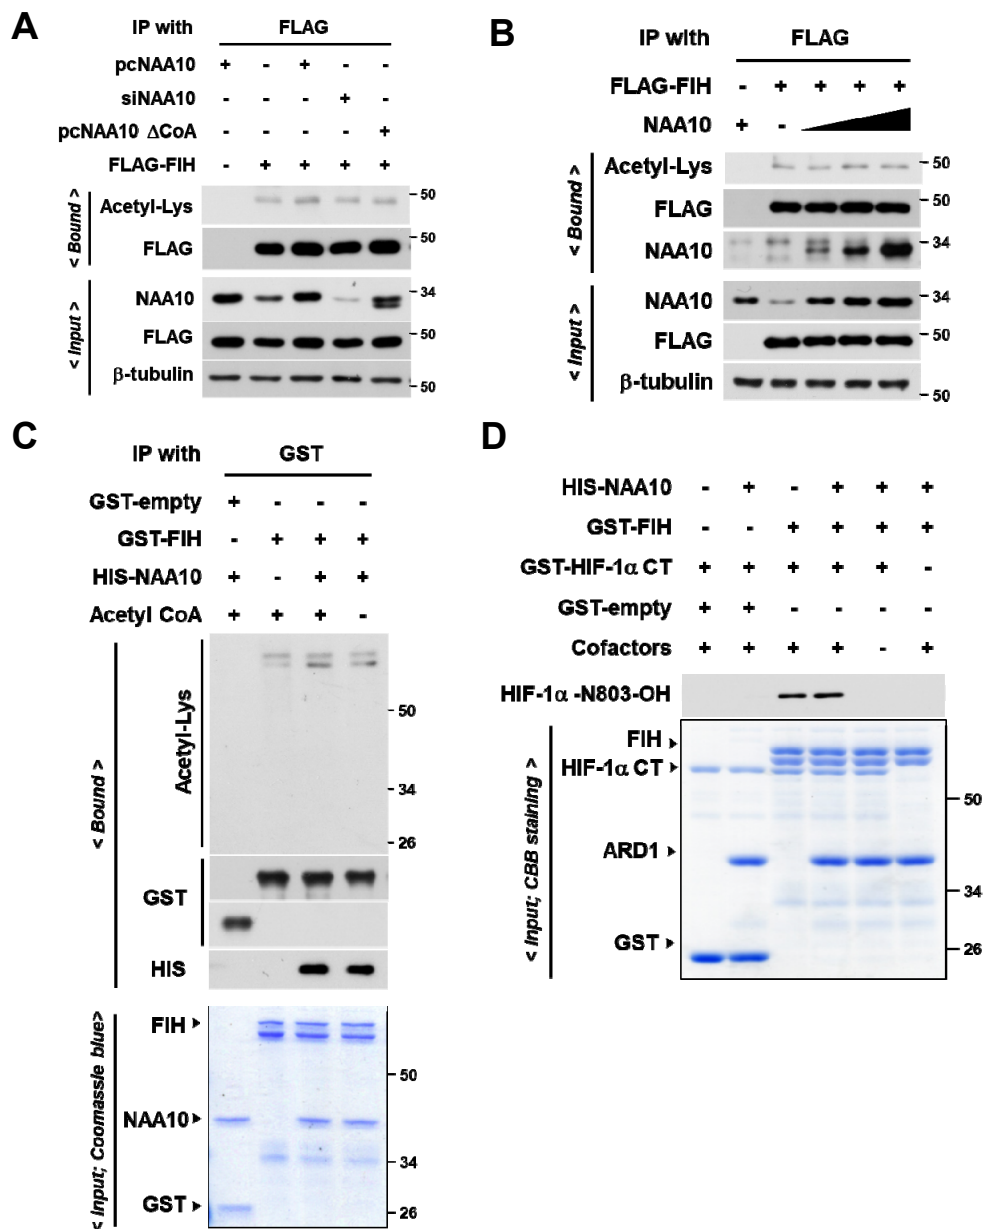

**Figure S2. FIH is not a substrate of NAA10.**

- A. HEK293 cells were transfected as indicated. FLAG-FIH was immunoprecipitated using FLAG affinity beads and immunoblotted with the indicated antibodies.
- B. HEK293 cells were co-transfected with FLAG-FIH and NAA10. FLAG-FIH was immunoprecipitated and immunoblotted.
- C. Recombinant peptides GST-FIH and HIS-NAA10 were reacted with acetyl-CoA at 37°C for 2 hr, and GST-FIH was pulled down with GSH affinity beads. Acetylated FIH was analyzed using anti-acetyl Lys antibody (Top). Peptide input in reaction mixture was verified by Coomassie blue staining (Bottom).
- D. GST-FIH, HIS-NAA10, GST-HIF-1α C-terminus, and free GST peptides were mixed as indicated, and reacted with cofactors at 37°C for 1 hr. N803-hydroxylation of HIF-1α C-terminus was analyzed using a monoclonal antibody against hydroxylated N803 residue (Top). Peptides on PAGE were stained with Coomassie brilliant blue (Bottom).

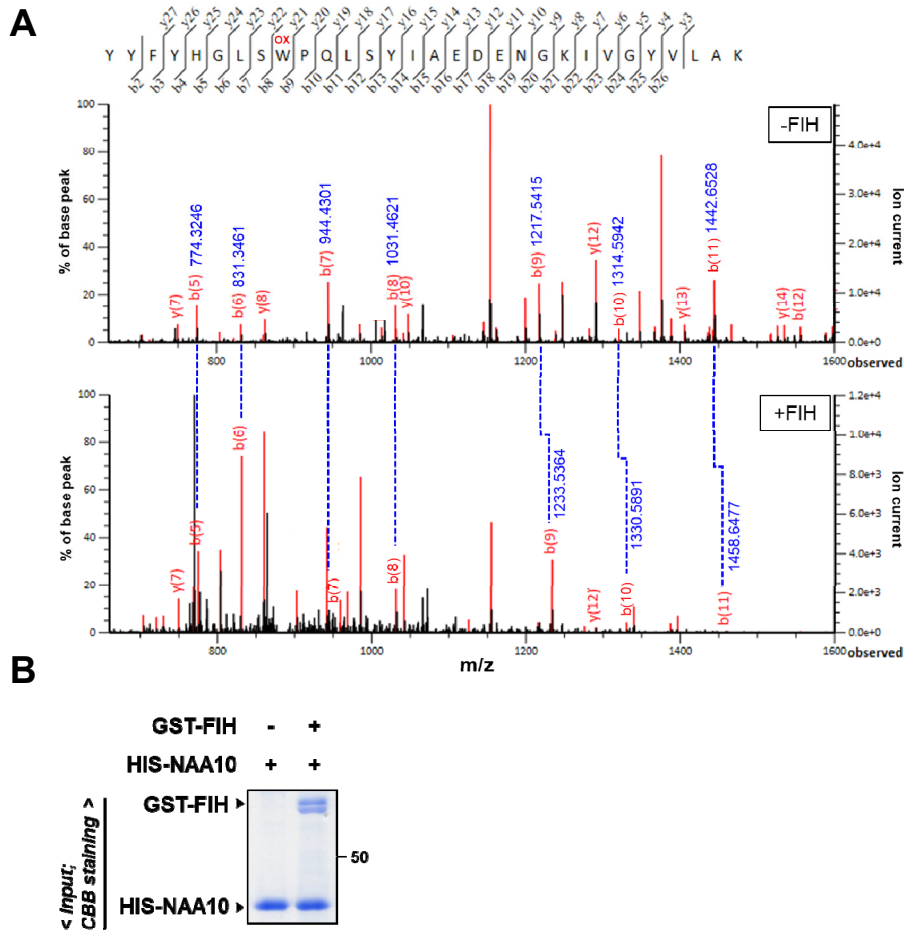

**Figure S3. LC-MS/MS spectra for NAA10.**

A. Recombinant peptides HIS-NAA10 was reacted with or without GST-FIH in a hydroxylation assay buffer at 37°C for 1 hr. HIS-NAA10 was electrophoresed, digested in gel, and subjected to LC-MS/MS.

B. Peptide input of *in vitro* hydroxylation assay for LC-MS/MS.

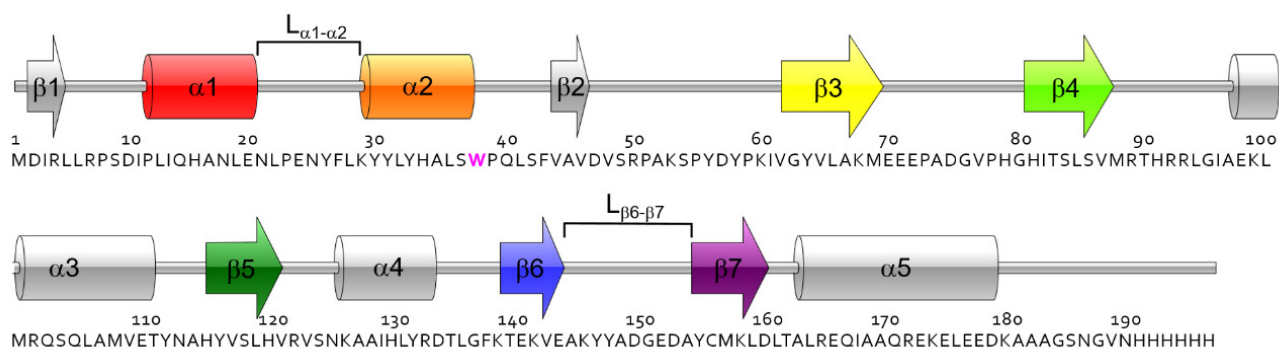

**Figure S4. The primary and secondary structures of NAA10.**

Secondary structural elements, from the crystal structure of NAA10/NAA15 complex (PDB code: 5nnp), are indicated above the sequences where  $\alpha$ -helices and  $\beta$ -sheets are represented by cylinders and arrows, respectively.

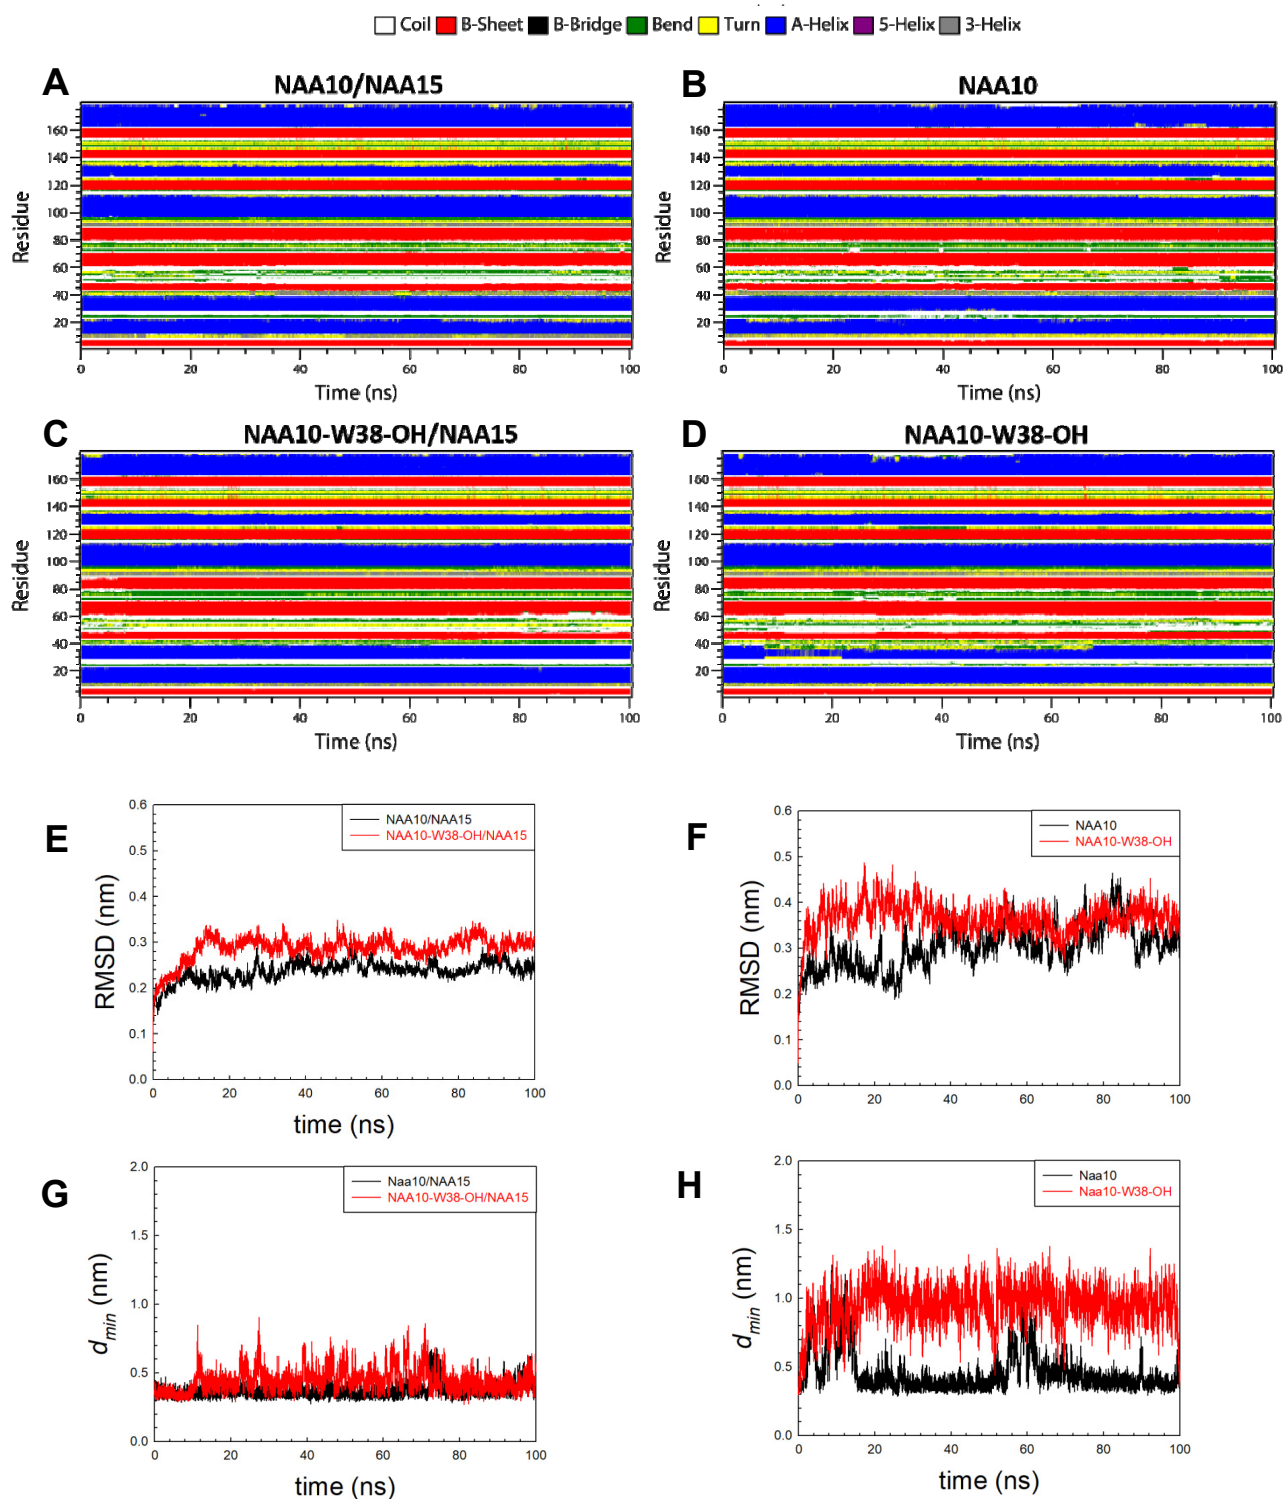

**Figure S5. Molecular structural analysis of NAA10 and NAA10/NAA15 upon W38-hydroxylation.**

A-D. The dictionary of protein secondary structure (DSSP) analysis for (A) NAA10 in the dimer with NAA15, (B) NAA10 in the monomer, (C) NAA10-W38OH in the dimer, and (D) NAA10-W38OH in the monomer.

E-H. The root mean square deviation (RMSD) from crystallographic data for NAA10 with and without W38-hydroxylation (E) in the dimeric, and (F) in the monomeric systems, and the minimal interloop distance  $d_{min}$  between  $L_{\beta 6-\beta 7}$  and  $L_{\alpha 1-\alpha 2}$  as a function of the MD simulation time for NAA10 with and without W38-hydroxylation (G) in the dimeric, and (H) in the monomeric systems.

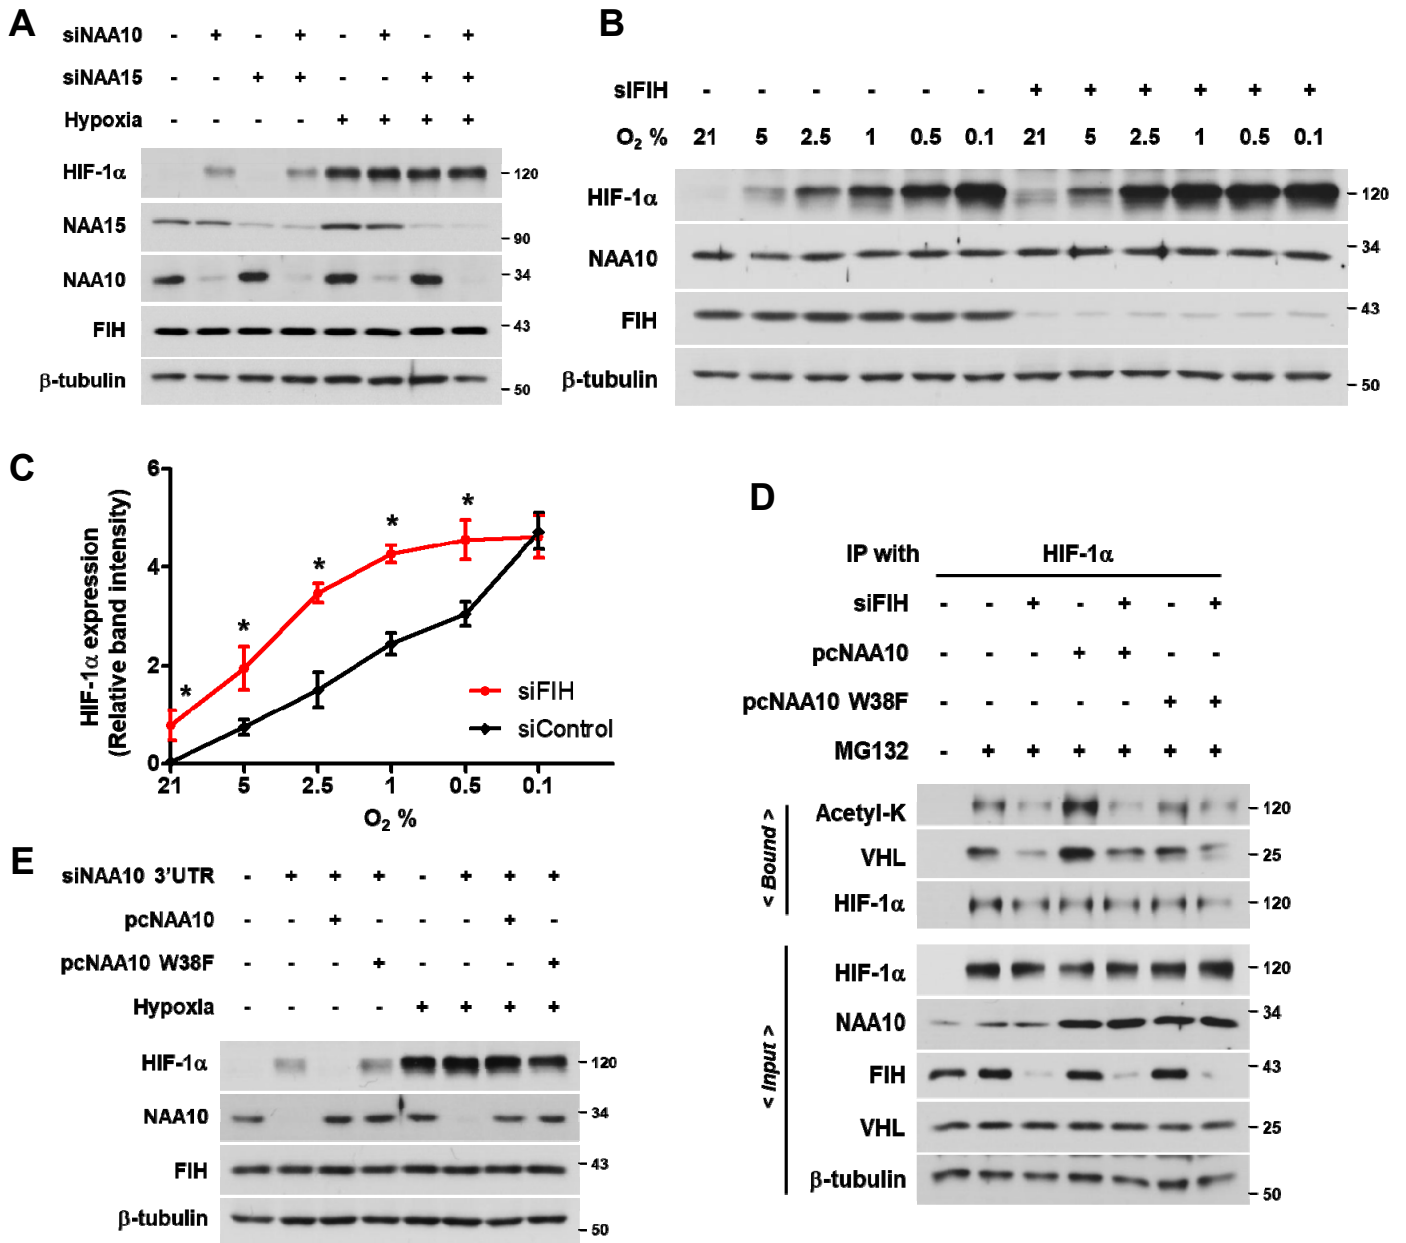

**Figure S6. HIF-1 $\alpha$  is partially stabilized by knocking-down either NAA10 or FIH.**

- A. MDA-MB-231 cells, in which NAA10 or NAA15 was knocked down, were incubated under normoxia or hypoxia (0.5% oxygen) for 4 hr, and subjected to immunoblotting.
- B. MDA-MB-231 cells, which had been transfected with control or FIH siRNA, were incubated at the indicated oxygen tension for 4 hr, and subjected to immunoblotting.
- C. The intensities of HIF-1 $\alpha$  and  $\beta$ -tubulin immunoblots in MDA-MB-231 cells were measured using the ImageJ software. HIF-1 $\alpha$  intensity in each condition was divided by  $\beta$ -tubulin intensity in the corresponding sample to normalize protein expression. Each symbol represents the mean  $\pm$  s.d. (n = 3) and \* denotes p < 0.05 versus the siControl group at the same oxygen level.
- D. MDA-MB-231 cells were co-transfected with the NNAA10 (or W38F) plasmid and FIH siRNA (or control siRNA). After treated with 10  $\mu$ M MG132 for 6 hr, cells were subjected to immunoprecipitation with anti-HIF-1 $\alpha$  antibody and immunoblotting with the indicated antibodies.
- E. MDA-MB-231 cells were transfected with a siRNA targeting 3'UTR of NAA10 and/or the NAA10 (or W38F) plasmid. After incubated under normoxia or hypoxia (0.5% O<sub>2</sub>) for 4 hr, cells were subjected to immunoblotting.
